# Supplementary material for: Evolution of the Piscine orthoreovirus Genome Linked to Emergence of Heart and Skeletal Muscle Inflammation in Farmed Atlantic Salmon (Salmo salar)
Source: PubMed Central journal article supplement (PMC6563308; doi:10.3390/v11050465), 2019-05-22
Supplement: viruses-11-00465-s001.pdf [file viruses-11-00465-s001.pdf]

## Supplementary Tables

**Table S1** Primers used for Sanger sequencing of the NOR-1997 strain.

| Primer name    | *Nucleotide sequence (5'-3')                   |
|----------------|------------------------------------------------|
| Lambda1 UTR_Fw | GCCGCTCGAGTCTAGAGATAATGTTTGT <b>TTT</b> GCCAT  |
| Lambda1 UTR_Rw | AAACGGG <b>CCCT</b> CTAGAGATGAAGTTGTCATGTTTGT  |
| Lambda2 UTR_Fw | GCCGCTCGAGTCTAGAGATAATTGTAACGACGAAAT           |
| Lambda2 UTR_Rw | AAACGGG <b>CCCT</b> CTAGAGATGAAGAAGGAACGGCCTA  |
| Lambda3 UTR_Fw | GCCGCTCGAGTCTAGAGATAATAATGGAGAAACCTA           |
| Lambda3 UTR_Rw | AAACGGG <b>CCCT</b> CTAGAGATGAAGAAGGATCGGCCCA  |
| Mu2 UTR_Fw     | GCCGCTCGAGTCTAGAGATAATAACTC <b>TTT</b> GCCAC   |
| Mu2 UTR_Rw     | AAACGGG <b>CCCT</b> CTAGAGATGAAAATCTCTTAAGCC   |
| Mu1 UTR_Fw     | GCCGCTCGAGTCTAGAGATAAATTTGTTTAACAGGC           |
| Mu1 UTR_Rw     | AAACGGG <b>CCCT</b> CTAGAGATGAAGATTTGTCGTTCCG  |
| MuNS UTR_Fw    | GCCGCTCGAGTCTAGAGATAAAGCTTACGACACGTG           |
| MuNS UTR_Rw    | AAACGGG <b>CCCT</b> CTAGAGATGAGGAGGGGAGCTCACA  |
| Sigma1 UTR_Fw  | GCCGCTCGAGTCTAGAGATAAAGATCTTAACCGCAG           |
| Sigma1 UTR_Rw  | AAACGGG <b>CCCT</b> CTAGAGATGAAAAACAGGCTTACCG  |
| Sigma2 UTR_Fw  | GCCGCTCGAGTCTAGAGATAAATTTGTTGGTGACGA           |
| Sigma2 UTR_Rw  | AAACGGG <b>CCCT</b> CTAGAGATGAAGAGGCGTGCTGACT  |
| SigmaNS UTR_Fw | GCCGCTCGAGTCTAGAGATAATTTTGATTGCATACA           |
| SigmaNS UTR_Rw | AAACGGG <b>CCCT</b> CTAGAGATGAAGAGATGTTTCGATTG |
| Sigma3 UTR_Fw  | GCCGCTCGAGTCTAGAGATAAAGACTTCTGTACGTG           |
| Sigma3 UTR_Rw  | AAACGGG <b>CCCT</b> CTAGAGATGAATAAGACCTCCTTCC  |

\*PRV-1 sequence specific regions are shown in bold.

**Table S2.** Number of reads of PRV-1 segments from the Illumina HiSeq4000 run.

| Segment      | L1     | L2     | L3     | M1    | M2    | M3    | S1    | S2    | S3    | S4    |
|--------------|--------|--------|--------|-------|-------|-------|-------|-------|-------|-------|
| NOR-2015/SSK | 3634   | 4460   | 2938   | 912   | 1016  | 1142  | 214   | 277   | 149   | 188   |
| NOR-2015/MS  | 1047   | 5106   | 793    | 474   | 1106  | 505   | 837   | 690   | 924   | 933   |
| FO/1978/15   | 207    | 270    | 163    | 120   | 87    | 98    | 128   | 52    | 76    | 40    |
| FO/41/16     | 261    | 220    | 225    | 111   | 76    | 113   | 90    | 102   | 100   | 82    |
| NOR-1988     | 211562 | 311365 | 203953 | 84962 | 72206 | 88916 | 55023 | 63314 | 72555 | 65535 |

**Table S3.** Amino acid differences between HSMI- and non-HSMI associated isolates compared to NOR-1988.

| Seg. | *Non-HSMI isolates |                 |                   | HSMI Isolates    |                  |                 |                 |                  |                 |                 |                   |
|------|--------------------|-----------------|-------------------|------------------|------------------|-----------------|-----------------|------------------|-----------------|-----------------|-------------------|
|      | NOR-1988           | FO/1978/15      | All NAPC isolates | NOR-1997         | NOR-2005/T       | NOR-050607      | NOR-2015/SSK    | NOR-2015/MS      | NOR-V3621       | GP-2010         | CGA-28005         |
| L1   | K <sub>16</sub>    |                 |                   |                  |                  |                 |                 |                  |                 | E <sub>16</sub> |                   |
|      | A <sub>30</sub>    |                 |                   |                  |                  |                 |                 | T <sub>30</sub>  |                 |                 |                   |
|      | S <sub>60</sub>    |                 |                   |                  |                  |                 |                 |                  |                 |                 | P <sub>60</sub>   |
|      | A <sub>63</sub>    | V <sub>63</sub> | V <sub>63</sub>   | V <sub>63</sub>  | V <sub>63</sub>  | V <sub>63</sub> | V <sub>63</sub> | V <sub>63</sub>  | V <sub>63</sub> | V <sub>63</sub> | V <sub>63</sub>   |
|      | I <sub>179</sub>   |                 |                   | V <sub>179</sub> | V <sub>179</sub> |                 |                 | V <sub>179</sub> |                 |                 |                   |
|      | V <sub>184</sub>   |                 |                   | A <sub>184</sub> | A <sub>184</sub> |                 |                 | A <sub>184</sub> |                 |                 |                   |
|      | T <sub>200</sub>   |                 |                   |                  |                  |                 |                 | S <sub>200</sub> |                 |                 |                   |
|      | D <sub>243</sub>   |                 |                   |                  |                  |                 |                 |                  |                 |                 | G <sub>243</sub>  |
|      | E <sub>343</sub>   |                 |                   | G <sub>343</sub> |                  |                 |                 |                  |                 |                 |                   |
|      | D <sub>347</sub>   |                 |                   | E <sub>347</sub> |                  |                 |                 |                  |                 |                 |                   |
|      | N <sub>372</sub>   |                 |                   | D <sub>372</sub> |                  |                 |                 | D <sub>372</sub> |                 |                 |                   |
|      | V <sub>490</sub>   |                 |                   | I <sub>490</sub> |                  |                 |                 |                  |                 |                 |                   |
|      | I <sub>601</sub>   |                 |                   |                  |                  |                 |                 |                  |                 |                 | T <sub>601</sub>  |
|      | N <sub>758</sub>   |                 |                   | S <sub>758</sub> | S <sub>758</sub> |                 |                 |                  |                 |                 |                   |
|      | D <sub>937</sub>   |                 |                   | A <sub>937</sub> |                  |                 |                 | A <sub>937</sub> |                 |                 |                   |
|      | V <sub>962</sub>   |                 |                   | I <sub>962</sub> |                  |                 |                 | I <sub>962</sub> |                 |                 |                   |
|      | N <sub>996</sub>   |                 |                   | S <sub>996</sub> |                  |                 |                 |                  |                 |                 |                   |
|      | R <sub>1065</sub>  |                 |                   |                  |                  |                 |                 |                  |                 |                 | W <sub>1065</sub> |



|                    |                         |                 |                 |                  |                  |                  |                  |                  |                  |                  |                  |
|--------------------|-------------------------|-----------------|-----------------|------------------|------------------|------------------|------------------|------------------|------------------|------------------|------------------|
|                    | <b>S</b> <sub>39</sub>  | P <sub>39</sub> | P <sub>39</sub> | P <sub>39</sub>  | P <sub>39</sub>  | P <sub>39</sub>  | P <sub>39</sub>  | P <sub>39</sub>  | P <sub>39</sub>  | P <sub>39</sub>  | P <sub>39</sub>  |
|                    | <b>T</b> <sub>69</sub>  |                 |                 | V <sub>69</sub>  | V <sub>69</sub>  | V <sub>69</sub>  | V <sub>69</sub>  | V <sub>69</sub>  | V <sub>69</sub>  | V <sub>69</sub>  | V <sub>69</sub>  |
|                    | <b>E</b> <sub>78</sub>  |                 |                 | D <sub>78</sub>  | D <sub>78</sub>  | D <sub>78</sub>  | D <sub>78</sub>  | D <sub>78</sub>  | D <sub>78</sub>  | D <sub>78</sub>  | D <sub>78</sub>  |
|                    | <b>A</b> <sub>85</sub>  |                 |                 | T <sub>85</sub>  | T <sub>85</sub>  | T <sub>85</sub>  | T <sub>85</sub>  | T <sub>85</sub>  | T <sub>85</sub>  | T <sub>85</sub>  | T <sub>85</sub>  |
|                    | <b>T</b> <sub>117</sub> |                 |                 | N <sub>117</sub> | N <sub>117</sub> | N <sub>117</sub> | N <sub>117</sub> | N <sub>117</sub> | N <sub>117</sub> | N <sub>117</sub> | N <sub>117</sub> |
|                    | <b>I</b> <sub>137</sub> |                 |                 | V <sub>137</sub> | V <sub>137</sub> | V <sub>137</sub> | V <sub>137</sub> | V <sub>137</sub> | V <sub>137</sub> | V <sub>137</sub> | V <sub>137</sub> |
|                    | <b>A</b> <sub>156</sub> |                 |                 | T <sub>156</sub> | T <sub>156</sub> | T <sub>156</sub> | T <sub>156</sub> | T <sub>156</sub> | T <sub>156</sub> | T <sub>156</sub> | T <sub>156</sub> |
|                    | <b>S</b> <sub>157</sub> |                 |                 | A <sub>157</sub> | A <sub>157</sub> | A <sub>157</sub> | A <sub>157</sub> | A <sub>157</sub> | A <sub>157</sub> | A <sub>157</sub> | A <sub>157</sub> |
|                    | <b>G</b> <sub>164</sub> |                 |                 |                  |                  |                  |                  |                  | G <sub>164</sub> |                  |                  |
|                    | <b>K</b> <sub>174</sub> |                 |                 | E <sub>174</sub> | E <sub>174</sub> | E <sub>174</sub> | E <sub>174</sub> | E <sub>174</sub> | E <sub>174</sub> | E <sub>174</sub> | E <sub>174</sub> |
|                    | <b>V</b> <sub>206</sub> |                 |                 | A <sub>206</sub> | A <sub>206</sub> | A <sub>206</sub> | A <sub>206</sub> | A <sub>206</sub> | A <sub>206</sub> | A <sub>206</sub> | A <sub>206</sub> |
|                    | <b>I</b> <sub>218</sub> |                 |                 | V <sub>218</sub> | V <sub>218</sub> | V <sub>218</sub> | V <sub>218</sub> | V <sub>218</sub> | V <sub>218</sub> | V <sub>218</sub> | V <sub>218</sub> |
| <b>S1</b><br>(p13) | <b>V</b> <sub>16</sub>  |                 |                 | A <sub>16</sub>  | A <sub>16</sub>  | A <sub>16</sub>  | A <sub>16</sub>  | A <sub>16</sub>  | A <sub>16</sub>  | A <sub>16</sub>  | A <sub>16</sub>  |
|                    | <b>T</b> <sub>39</sub>  |                 |                 | M <sub>39</sub>  | M <sub>39</sub>  | M <sub>39</sub>  | M <sub>39</sub>  | M <sub>39</sub>  | M <sub>39</sub>  | M <sub>39</sub>  | M <sub>39</sub>  |
|                    | <b>M</b> <sub>50</sub>  |                 |                 | T <sub>50</sub>  | T <sub>50</sub>  | T <sub>50</sub>  | T <sub>50</sub>  | T <sub>50</sub>  | T <sub>50</sub>  | T <sub>50</sub>  | T <sub>50</sub>  |
|                    | <b>K</b> <sub>52</sub>  |                 |                 | I <sub>52</sub>  | I <sub>52</sub>  | I <sub>52</sub>  | I <sub>52</sub>  | I <sub>52</sub>  | I <sub>52</sub>  | I <sub>52</sub>  | I <sub>52</sub>  |
|                    | <b>A</b> <sub>74</sub>  |                 |                 | V <sub>74</sub>  | V <sub>74</sub>  | V <sub>74</sub>  | V <sub>74</sub>  | V <sub>74</sub>  | V <sub>74</sub>  | V <sub>74</sub>  | V <sub>74</sub>  |
|                    | <b>R</b> <sub>76</sub>  | Q <sub>76</sub> |                 | Q <sub>76</sub>  | Q <sub>76</sub>  | Q <sub>76</sub>  | Q <sub>76</sub>  | Q <sub>76</sub>  | Q <sub>76</sub>  | Q <sub>76</sub>  | Q <sub>76</sub>  |
|                    | <b>Q</b> <sub>81</sub>  |                 |                 | R <sub>81</sub>  | R <sub>81</sub>  | R <sub>81</sub>  | R <sub>81</sub>  | R <sub>81</sub>  | R <sub>81</sub>  | R <sub>81</sub>  | R <sub>81</sub>  |
|                    | <b>L</b> <sub>91</sub>  |                 |                 | M <sub>91</sub>  | M <sub>91</sub>  | M <sub>91</sub>  | M <sub>91</sub>  | M <sub>91</sub>  | M <sub>91</sub>  | M <sub>91</sub>  | M <sub>91</sub>  |
| <b>S2</b>          |                         |                 | **              |                  |                  |                  |                  |                  |                  |                  |                  |
| <b>S3</b>          | <b>I</b> <sub>336</sub> |                 | **              |                  |                  |                  |                  |                  |                  |                  | V <sub>336</sub> |
| <b>S4</b>          | <b>A</b> <sub>75</sub>  |                 |                 |                  |                  |                  |                  |                  |                  |                  | V <sub>75</sub>  |
|                    | <b>V</b> <sub>107</sub> |                 |                 |                  |                  |                  |                  | A <sub>107</sub> |                  |                  |                  |
|                    | <b>D</b> <sub>252</sub> |                 |                 |                  |                  | N <sub>252</sub> | N <sub>252</sub> |                  | N <sub>252</sub> |                  | N <sub>252</sub> |

\*Amino acid sites consistently found in HSMI-associated isolates not present in NAPC, Faroe Island isolates and NOR-1988 are considered unique.

\*\*The overall majority of NAPC sequences were identical to the NOR-1988 strain, but a few displayed minor differences.

**Table S4.** SNPs in M2 and S1 segment coding sequence of Norwegian HSMI strains compared to other NAPC and non-HSMI (NOR-1988, Faroes isolates).

S4. A

|                                               |                         |                                                                      |                                                                                     |                                                   |                         |                         |
|-----------------------------------------------|-------------------------|----------------------------------------------------------------------|-------------------------------------------------------------------------------------|---------------------------------------------------|-------------------------|-------------------------|
| 1. T80- <b>C80</b>                            | 2. C189- <b>T189</b>    | 3. T203- <b>C203</b> (only in CGA280-05)                             | 4. C212- <b>T212</b>                                                                | 5. A239- <b>G239</b>                              | 6. G275- <b>A275</b>    | 7. A281- <b>G281</b>    |
| 8. C299- <b>T299</b>                          | 9. G302- <b>A302</b>    | 10. A336- <b>G336</b> (only in CGA280-05)                            | 11. T362- <b>C362</b>                                                               | 12. C404- <b>G404</b>                             | 13. A410- <b>G410</b>   | 14. G419- <b>A419</b>   |
| 15. T464- <b>C464</b>                         | 16. G550-C550           | 17. T581- <b>C581</b> (In Salmo/GP-2010/NOR, NOR-2015/MS, CGA280-05) | 18. C782- <b>T782</b>                                                               | 19. G783- <b>T783</b>                             | 20. T806- <b>C806</b>   | 21. T869- <b>C869</b>   |
| 22. C896- <b>T896</b>                         | 23. C902- <b>T902</b>   | 24. C905- <b>T905</b>                                                | 25. G917- <b>A917</b>                                                               | 26. T942- <b>C942</b> (NOR-2015/MS, NOR-2015/SSK) | 27. A944- <b>G944</b>   | 28. G950- <b>A950</b>   |
| 29. A960- <b>C960</b>                         | 30. C983- <b>T983</b>   | 31. T1004- <b>A1004</b>                                              | 32. C1046- <b>T1046</b>                                                             | 33. T1049- <b>C1049</b>                           | 34. G1070- <b>A1070</b> | 35. C1098- <b>T1098</b> |
| 36. C1100- <b>A1100</b>                       | 37. A1107- <b>G1107</b> | 38. A1118- <b>G1118</b> (only in NOR-2015/MS)                        | 39. T1142- <b>C1142</b>                                                             | 40. G1199- <b>A1199</b>                           | 41. A1214- <b>G1214</b> | 42. A1217- <b>G1217</b> |
| 43. G1230- <b>A1230</b> (only in NOR-2015/MS) | 44. G1247- <b>A1247</b> | 45. A1268- <b>T1268</b>                                              | 46. A1402- <b>G1402</b> (only in NOR-2015/MS)                                       | 47. A1458- <b>G1458</b> (only in NOR-2015/MS)     | 48. C1550- <b>T1550</b> | 49. G1583- <b>A1583</b> |
| 50. C1640- <b>T1640</b>                       | 51. A1694- <b>G1694</b> | 52. C1751- <b>T1751</b>                                              | 53. A1763- <b>G1763</b>                                                             | 54. A1775- <b>G1775</b>                           | 55. G1847- <b>A1847</b> | 56. A1880- <b>G1880</b> |
| 57. A1901- <b>G1901</b>                       | 58. A1940- <b>G1940</b> | 59. G1994- <b>A1994</b>                                              | 60. T2000- <b>C2000</b> ((In NOR-1997, NOR-050607, NOR2012-V3621, NOR-2015/MS, NOR- |                                                   |                         |                         |

|  |  |  |                         |  |  |  |
|--|--|--|-------------------------|--|--|--|
|  |  |  | 2015/SSK,<br>CGA280-05) |  |  |  |
|--|--|--|-------------------------|--|--|--|

S4. B S1 segment

|                                              |                                                  |                       |                       |                       |                       |                       |
|----------------------------------------------|--------------------------------------------------|-----------------------|-----------------------|-----------------------|-----------------------|-----------------------|
| 1. A68- <b>G68</b><br>(only in<br>CGA280-05) | 2. C75- <b>T75</b><br>(only in<br>CGA280-<br>05) | 3. T126- <b>C126</b>  | 4. C195- <b>T195</b>  | 5. A205- <b>G205</b>  | 6. C206- <b>T206</b>  | 7. C228- <b>T228</b>  |
| 8. A234-<br><b>T234</b>                      | 9. G253-<br><b>A253</b>                          | 10. C300- <b>T300</b> | 11. A321- <b>G321</b> | 12. C350- <b>A350</b> | 13. A409- <b>G409</b> | 14. G466- <b>A466</b> |
| 15. T469-<br><b>G469</b>                     | 16. G491-<br><b>A491</b><br>(NOR-<br>050607)     | 17. T492- <b>C492</b> | 18. G504- <b>T504</b> | 19. C507- <b>T507</b> | 20. A520- <b>G520</b> | 21. G564- <b>A564</b> |
| 22. T617-<br><b>C617</b>                     | 23. A652-<br><b>G652</b>                         | 24. A705- <b>G705</b> | 25. T735- <b>C735</b> | 26. A747- <b>G747</b> | 27. A789- <b>G789</b> | 28. C879- <b>T879</b> |
| 29. C900-<br><b>T900</b>                     | 30. T957-<br><b>C957</b>                         |                       |                       |                       |                       |                       |

**The non-HSMI (Faroese and NOR-1988) and other NAPC isolates nucleotides are indicated in black color with the position of nt starting from coding sequence**

MH093978.1, MH093979.1, MH093980.1, MH093981.1, MH093982.1, MH093983.1, MH093984.1, MH093985.1, MH093986.1, MH093987.1, MH093988.1, MH093989.1, MH093990.1, MK675888.1 FO/41/16 MK675878.1 FO/1978/15, MK675868.1 NOR-1988, KX851971.1# KC473454.1, KT429736.1\* , KX851970.1# KT429746.1, KC473453.1, KT429756.1\*

**The corresponding SNP in Norwegian HSMI isolates are highlighted in red color**

KC795571.1 CGA280-05, MK675848.1 NOR-2015/MS, MK675858.1 NOR-2015/SSK, KY429949.1 NOR2012V3621, GU994022.1 Salmo/GP-2010/NOR, KR337479.1 NOR-050607, MK675838.1 NOR-2005/TT, MK675828.1 NOR-1997

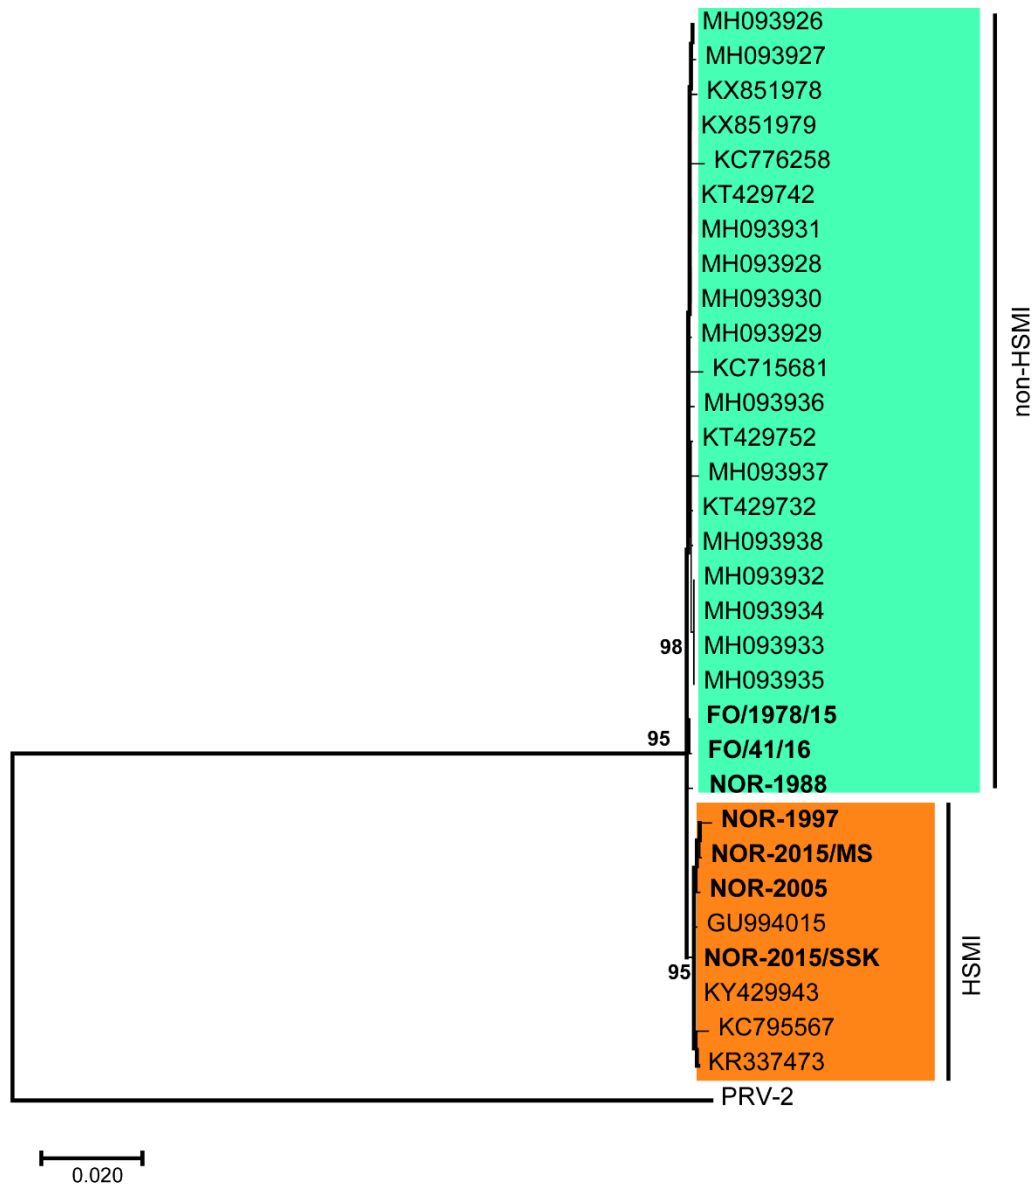

**Fig. S1.** Phylogenetic analysis of concatenated full genome amino acid sequences. PRV-2 is included as outgroup.

## A. $\sigma 3$ protein

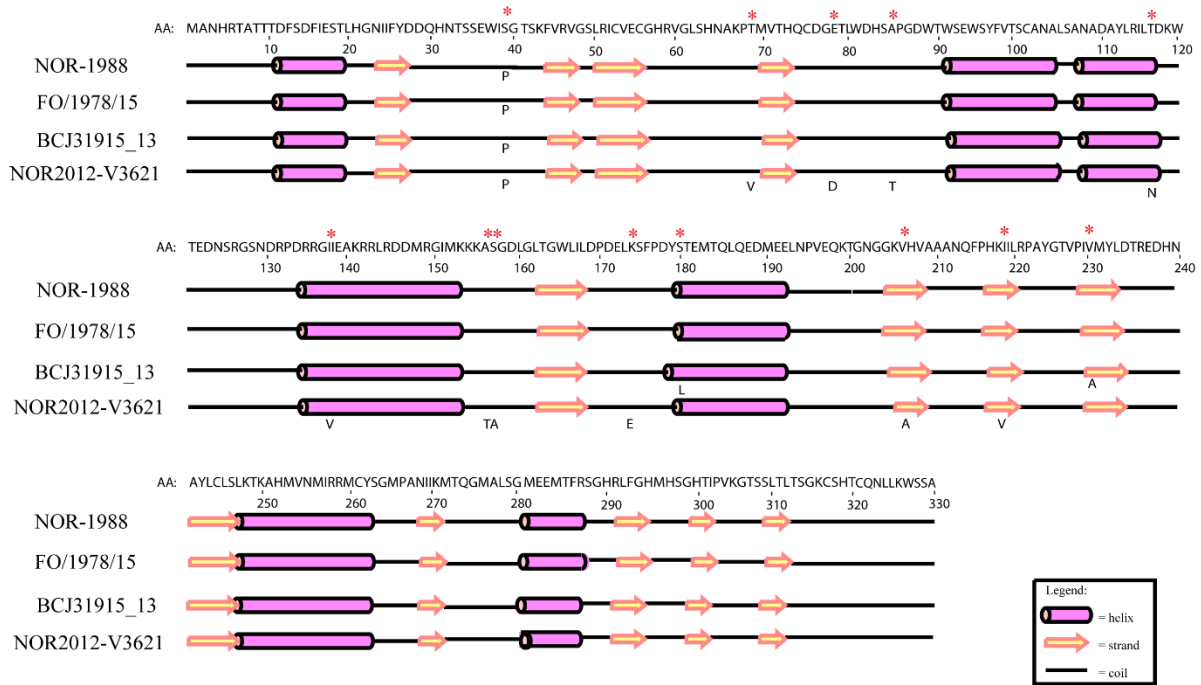

## B. p13 protein

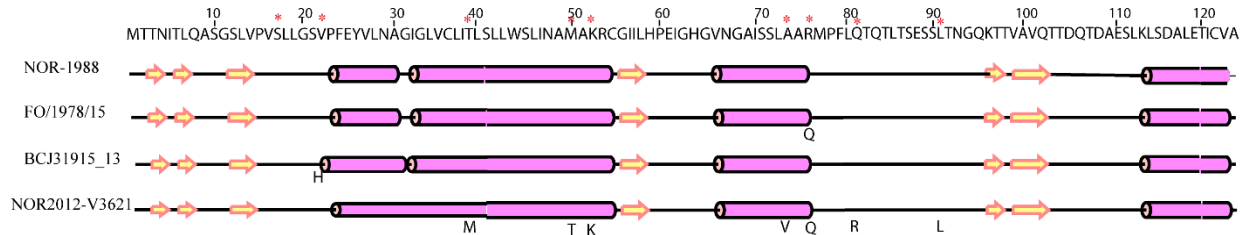

**Fig. S2.** Secondary structure predictions of  $\sigma 3$  and p13 proteins showing similar structure between NOR2012 and selected non-HSMI-associated strains for both proteins, respectively. Amino acid differences are indicated by red asterisks. The amino acid difference is indicated below the alignment.
